# Supplementary material for: How can we realise the full potential of health systems for nutrition?
Source: PubMed Central journal article supplement (PMC7461910; doi:10.1136/bmj.l6911), 2020-01-26
Supplement: heir51691.ww1.pdf [file heir51691.ww1.pdf]

## Supplementary Materials 1: Additional information about methods

For all national coverage estimates we calculated survey-weighted indicators according to the definitions in Supplementary Materials Table 1 below. Estimates were stratified by geographic region and urban/rural residence using variables available in the Demographic and Health Surveys (DHS) & Multiple Indicator Cluster Surveys (MICS) datasets.

We generated pooled estimates for all countries and by [World Bank Income Group](#) by taking an unweighted mean of the country-specific estimates.

For current estimates (2013-2018) of intervention coverage (Figures 1 and 2) we included countries which had either a DHS or a MICS with estimates for both the nutrition intervention indicator and the associated health service indicator. If countries had more than one survey in 2013-2018, we used the most recent estimate.

For each World Bank country income group we described the 10-year trend in coverage of the interventions and delivery platforms across rural and urban areas between 2008-2018 (Figure 3-6) by fitting linear (OLS) models using survey year, rural-urban stratifier, and an interaction between year & rural-urban stratifier. We included the subset of countries which had at least one DHS or MICS in each of two time periods: 2008 to 2012, and 2013 to 2018 and included all available estimates for each country across that period.

In cases where World Bank country income group changed over the course of the analysis period – for example Albania which was classified as a “Lower-middle income” country in 2008, and an “Upper-middle income” country in 2017 – we used the most recent income group assignment.

Analyses were conducted in Stata, R, and Excel.

**Limitations:** Some limitations of the data we used for this analysis deserve mention. First, we were limited to inclusion of countries that have a DHS or MICS survey and as such results are not representative of all countries within an income group. Also The number of countries is particularly small and selective for UMIC and should be interpreted with care. surveys are carried out approximately every 3-5 years cut actual timing varies widely across countries, making it difficult to assess microvariations over time, which may be occurring. Second, DHS and MICS rely on maternal recall over variable periods of up to 3 years and may be subject to recall error. Sampling frames for most surveys included in this analysis were not designed to be sub-nationally representative. Finally, our coverage indicators do not reflect quality of services delivered, and although work is underway to develop quality-adjusted nutrition coverage measurements for nutrition.

**Supplementary Table 1: Indicator Definitions** (green denotes nutrition intervention; white shading denotes health service platform)

| <i>Variable name</i> | <i>Indicator name</i>                                | <i>Numerator</i>                                                                                                                                                                                | <i>Denominator</i>                                                                                                               |
|----------------------|------------------------------------------------------|-------------------------------------------------------------------------------------------------------------------------------------------------------------------------------------------------|----------------------------------------------------------------------------------------------------------------------------------|
| anc4                 | Antenatal care (four or more visits)                 | Number of women ages 15–49 who were attended four or more times during the pregnancy that led to their last birth in the X years preceding the survey by any provider                           | Total number of women ages 15–49 with a live birth in the X years preceding the survey (X= 2 for MICS; 3 for DHS)                |
| ironpreg             | Iron supplementation during pregnancy (took 90+days) | Number of pregnant women who received the recommended number of iron/folic acid tablets (at least 90) during last pregnancy                                                                     | Total number of interviewed women who had one or more live births in the X years preceding the survey (X= 2 for MICS; 5 for DHS) |
| ideliv               | Facility delivery                                    | Number of interviewed women who had one or more live births in a public or private health facility in the X years preceding the survey                                                          | Total number of interviewed women who had one or more live births in the X years preceding the survey (X= 2 for MICS; 5 for DHS) |
| bfearly              | Early initiation of BF                               | Number of women with a live birth in the 2 years prior to the survey who put the newborn infant to the breast within one hour of birth                                                          | Total number of women with a live birth in the 2 years prior to the survey                                                       |
| pncbaby              | Postnatal care for all babies                        | Number of last live births in the 2 years who received a health check while in facility or at home following delivery, or a postnatal care visit within 2 days after delivery                   | Total number of last live birth the 2 years prior to the survey (regardless of place of delivery)                                |
| bfco                 | BF counseling <b>OR</b> observation                  | Number of women age 15-49 with a live birth in the 2 years before the survey who were observed <b>OR</b> counseling about breastfeeding by a health provider in the first 2 days after delivery | Total number of women age 15-49 with a live birth in the 2 years before the survey                                               |
| vita                 | Vitamin A supplementation for children               | Number of children age 6-59 months who received vitamin A in the past 6 months                                                                                                                  | Total number of children ages 6-59 months                                                                                        |
| ors                  | ORS                                                  | Number of children ages 0–59 months with diarrhoea in the two weeks prior to the survey receiving oral rehydration salts                                                                        | Total number of children ages 0–59 months with diarrhoea in the two weeks prior to the survey                                    |
| zincd                | Zinc treatment for diarrhoea                         | Number of children ages 0–59 months with diarrhoea in the two weeks prior to the survey receiving zinc                                                                                          | Total number of children ages 0–59 months with diarrhoea in the two weeks prior to the survey                                    |

**Supplementary Table 2: Surveys contributing to Figure 1-2 current period estimates (2013-2018) by year, survey type and indicator**

| Income Group               | Country               | Year | Survey Type | Indicator |      |         |        |          |     |         |      |       |
|----------------------------|-----------------------|------|-------------|-----------|------|---------|--------|----------|-----|---------|------|-------|
|                            |                       |      |             | anc4      | bfco | bfearly | ideliv | ironpreg | ors | pncbaby | vita | zincd |
| Low income (LIC)           | Afghanistan           | 2015 | DHS         | X         |      | X       | X      | X        | X   |         | X    | X     |
|                            | Bangladesh            | 2014 | DHS         |           |      | X       | X      |          | X   |         | X    | X     |
|                            | Benin                 | 2014 | MICS        |           |      | X       | X      |          | X   |         | X    | X     |
|                            | Cambodia              | 2014 | DHS         | X         |      | X       | X      | X        | X   |         | X    | X     |
|                            | Chad                  | 2014 | DHS         | X         |      | X       | X      | X        | X   |         | X    | X     |
|                            | Malawi                | 2015 | DHS         | X         | X    | X       | X      | X        | X   | X       | X    | X     |
|                            | Mali                  | 2015 | MICS        |           |      | X       | X      |          | X   |         |      | X     |
|                            | Nepal                 | 2014 | MICS        |           |      | X       | X      |          |     |         |      |       |
|                            | Rwanda                | 2014 | DHS         | X         |      | X       | X      | X        |     |         | X    |       |
|                            | Sierra Leone          | 2017 | MICS        |           |      | X       | X      |          | X   |         |      | X     |
|                            | Tajikistan            | 2017 | DHS         | X         | X    | X       | X      | X        | X   | X       | X    | X     |
|                            | Tanzania              | 2015 | DHS         | X         | X    | X       | X      | X        | X   |         | X    | X     |
| Zimbabwe                   | 2015                  | DHS  | X           | X         | X    | X       | X      | X        | X   | X       | X    |       |
| Lower Middle Income (LMIC) | Armenia               | 2015 | DHS         | X         | X    | X       | X      | X        | X   | X       |      | X     |
|                            | Cameroon              | 2014 | MICS        |           |      | X       | X      |          | X   |         | X    | X     |
|                            | Congo Republic        | 2014 | MICS        |           |      | X       | X      |          | X   |         |      | X     |
|                            | Egypt                 | 2014 | DHS         | X         |      | X       | X      | X        | X   |         | X    | X     |
|                            | El Salvador           | 2014 | MICS        |           |      | X       | X      |          | X   |         | X    | X     |
|                            | Eswatini              | 2014 | MICS        |           |      | X       | X      |          | X   |         | X    | X     |
|                            | Ghana                 | 2014 | DHS         | X         |      | X       | X      | X        | X   |         | X    | X     |
|                            | Guatemala             | 2014 | DHS         | X         |      | X       | X      | X        | X   |         | X    | X     |
|                            | Guyana                | 2014 | MICS        |           |      | X       | X      |          |     |         |      |       |
|                            | Lesotho               | 2014 | DHS         | X         |      | X       | X      | X        | X   |         | X    | X     |
|                            | Pakistan              | 2017 | DHS         | X         | X    | X       | X      | X        | X   | X       | X    | X     |
|                            | Philippines           | 2017 | DHS         | X         | X    | X       | X      | X        | X   | X       | X    | X     |
|                            | Sao Tome and Principe | 2014 | MICS        |           |      | X       | X      |          |     |         | X    |       |
|                            | Senegal               | 2017 | DHS         | X         | X    | X       | X      | X        | X   | X       | X    | X     |
|                            | State of Palestine    | 2014 | MICS        |           |      | X       | X      |          |     |         |      |       |
|                            | Sudan                 | 2014 | MICS        |           |      | X       | X      |          | X   |         | X    | X     |
|                            | Kenya                 | 2014 | DHS         | X         |      | X       | X      | X        | X   |         | X    | X     |
| Kyrgyzstan                 | 2014                  | MICS |             |           | X    | X       |        | X        |     |         | X    |       |
| Mauritania                 | 2015                  | MICS |             |           | X    | X       |        | X        |     |         | X    |       |
| Upper-middle income (UMIC) | Albania               | 2017 | DHS         | X         | X    | X       | X      | X        | X   | X       |      | X     |
|                            | Belize                | 2015 | MICS        |           |      | X       | X      |          | X   |         |      | X     |
|                            | Iraq                  | 2018 | MICS        |           | X    | X       | X      |          | X   |         |      | X     |
|                            | Colombia              | 2015 | DHS         |           |      |         |        |          |     |         |      |       |
|                            | Cuba                  | 2014 | MICS        |           |      | X       |        |          | X   |         |      | X     |
|                            | Jordan                | 2017 | DHS         | X         | X    | X       | X      | X        | X   | X       | X    | X     |
|                            | Kazakhstan            | 2015 | MICS        |           |      | X       | X      |          |     |         |      |       |
|                            | Peru                  | 2015 | NSS         | X         |      | X       | X      | X        | X   |         | X    | X     |
|                            | Serbia                | 2014 | MICS        |           |      | X       | X      |          |     |         |      |       |
|                            | Thailand              | 2015 | MICS        |           |      | X       | X      |          |     |         |      |       |

**Supplementary Table 3: Surveys contributing to Figure 3-6 trend estimates (2008-2018) by year, survey type and indicator**

| Income Group               | Country        | Survey Year | Survey Type | Period 1 (2008-2012) |          |        |         |      |     |       | Period 2 (2013-2018) |             |      |          |        |         |      |     |       |
|----------------------------|----------------|-------------|-------------|----------------------|----------|--------|---------|------|-----|-------|----------------------|-------------|------|----------|--------|---------|------|-----|-------|
|                            |                |             |             | anc4                 | ironpreg | ideliv | bfearly | vita | ors | zincd | Survey Year          | Survey Type | anc4 | ironpreg | ideliv | bfearly | vita | ors | zincd |
| Low income (LIC)           | Afghanistan    | 2010        | MICS        |                      |          | X      | X       | X    | X   | X     | 2015                 | DHS         | X    | X        | X      | X       | X    | X   | X     |
|                            | Benin          | 2011        | DHS         | X                    | X        | X      | X       | X    | X   | X     | 2014                 | MICS        |      |          | X      | X       | X    | X   | X     |
|                            | Cambodia       | 2010        | DHS         | X                    | X        | X      | X       | X    | X   | X     | 2014                 | DHS         | X    | X        | X      | X       | X    | X   | X     |
|                            | Chad           | 2010        | MICS        |                      |          | X      | X       | X    | X   | X     | 2014                 | DHS         | X    | X        | X      | X       | X    | X   | X     |
|                            | Malawi         | 2010        | DHS         | X                    | X        | X      | X       | X    | X   | X     | 2015                 | DHS         | X    | X        | X      | X       | X    | X   | X     |
|                            | Mali           | 2009        | MICS        |                      |          | X      | X       | X    |     |       | 2015                 | MICS        |      |          | X      | X       |      | X   | X     |
|                            |                | 2012        | DHS         | X                    | X        | X      | X       | X    | X   | X     |                      |             |      |          |        |         |      |     |       |
|                            | Mozambique     | 2008        | MICS        |                      |          | X      | X       |      |     |       | 2015                 | AIS         |      |          |        |         |      | X   | X     |
|                            |                | 2011        | DHS         | X                    | X        | X      | X       | X    |     |       |                      |             |      |          |        |         |      |     |       |
|                            | Nepal          | 2011        | DHS         | X                    | X        | X      | X       | X    | X   | X     | 2014                 | MICS        |      |          | X      | X       |      |     |       |
|                            | Rwanda         | 2010        | DHS         | X                    | X        | X      | X       | X    |     |       | 2014                 | DHS         | X    | X        | X      | X       | X    |     |       |
|                            | Senegal        | 2010        | DHS         | X                    | X        | X      | X       | X    | X   | X     | 2015                 | DHS         | X    | X        | X      | X       | X    | X   | X     |
|                            |                | 2012        | DHS         | X                    | X        | X      | X       | X    | X   | X     | 2017                 | DHS         | X    | X        | X      | X       | X    | X   | X     |
|                            | Sierra Leone   | 2008        | DHS         | X                    | X        | X      | X       | X    | X   | X     | 2017                 | MICS        |      |          | X      | X       |      | X   | X     |
|                            |                | 2010        | MICS        |                      |          | X      | X       | X    | X   | X     |                      |             |      |          |        |         |      |     |       |
|                            | Tajikistan     | 2012        | DHS         | X                    | X        | X      | X       | X    | X   | X     | 2017                 | DHS         | X    | X        | X      | X       | X    | X   | X     |
|                            | Tanzania       | 2010        | DHS         | X                    | X        | X      | X       | X    | X   | X     | 2015                 | DHS         | X    | X        | X      | X       | X    | X   | X     |
|                            | Zimbabwe       | 2009        | MICS        |                      |          | X      | X       | X    |     |       | 2014                 | MICS        |      |          | X      | X       | X    | X   | X     |
| 2010                       |                | DHS         | X           | X                    | X        | X      | X       | X    | X   | 2015  | DHS                  | X           | X    | X        | X      | X       | X    | X   |       |
| Lower-middle income (LMIC) | Armenia        | 2010        | DHS         | X                    | X        | X      | X       |      | X   | X     | 2015                 | DHS         | X    | X        | X      | X       |      | X   | X     |
|                            | Bangladesh     | 2011        | DHS         |                      |          | X      | X       | X    | X   | X     | 2014                 | DHS         |      |          | X      | X       | X    | X   | X     |
|                            |                | 2012        | MICS        |                      |          | X      | X       |      | X   | X     |                      |             |      |          |        |         |      |     |       |
|                            | Cameroon       | 2011        | DHS         | X                    | X        | X      | X       | X    | X   | X     | 2014                 | MICS        |      |          | X      | X       | X    | X   | X     |
|                            | Congo Republic | 2011        | DHS         | X                    | X        | X      | X       | X    |     |       | 2014                 | MICS        |      |          | X      | X       |      | X   | X     |
|                            | Egypt          | 2008        | DHS         | X                    | X        | X      | X       | X    | X   | X     | 2014                 | DHS         | X    | X        | X      | X       | X    | X   | X     |
|                            | El Salvador    | 2008        | RHS         |                      |          | X      | X       | X    |     |       | 2014                 | MICS        |      |          | X      | X       | X    | X   | X     |
|                            | Eswatini       | 2010        | MICS        |                      |          | X      | X       | X    |     |       | 2014                 | MICS        |      |          | X      | X       | X    | X   | X     |
|                            | Ghana          | 2008        | DHS         | X                    | X        | X      | X       | X    | X   | X     | 2014                 | DHS         | X    | X        | X      | X       | X    | X   | X     |
|                            |                | 2011        | MICS        |                      |          | X      | X       | X    | X   | X     |                      |             |      |          |        |         |      |     |       |
|                            | Guatemala      | 2008        | RHS         |                      |          | X      | X       | X    |     |       | 2014                 | DHS         | X    | X        | X      | X       | X    | X   | X     |
|                            | Guyana         | 2009        | DHS         | X                    | X        | X      | X       |      | X   | X     | 2014                 | MICS        |      |          | X      | X       |      |     |       |
|                            | Kenya          | 2008        | DHS         | X                    | X        | X      | X       | X    | X   | X     | 2014                 | DHS         | X    | X        | X      | X       | X    | X   | X     |
|                            | Kyrgyzstan     | 2012        | DHS         | X                    | X        | X      | X       | X    | X   | X     | 2014                 | MICS        |      |          | X      | X       |      | X   | X     |

| Income Group               | Country             | Survey Year | Survey Type | Period 1 (2008-2012) |          |        |         |      |     |       | Period 2 (2013-2018) |             |                  |          |        |         |      |     |       |   |
|----------------------------|---------------------|-------------|-------------|----------------------|----------|--------|---------|------|-----|-------|----------------------|-------------|------------------|----------|--------|---------|------|-----|-------|---|
|                            |                     |             |             | anc4                 | ironpreg | ideliv | bfearly | vita | ors | zincd | Survey Year          | Survey Type | anc4             | ironpreg | ideliv | bfearly | vita | ors | zincd |   |
|                            | Lesotho             | 2009        | DHS         | X                    | X        | X      | X       | X    |     |       | 2014                 | DHS         | X                | X        | X      | X       | X    | X   | X     |   |
|                            | Mauritania          | 2011        | MICS        |                      |          | X      | X       | X    | X   | X     | 2015                 | MICS        |                  |          | X      | X       |      | X   | X     |   |
|                            | Pakistan            | 2012        | DHS         | X                    | X        | X      | X       | X    | X   | X     | 2017                 | DHS         | X                | X        | X      | X       | X    | X   | X     |   |
|                            | Philippines         | 2008        | DHS         | X                    | X        | X      | X       | X    | X   | X     | 2017                 | DHS         | X                | X        | X      | X       | X    | X   | X     |   |
|                            | Sao Tome & Principe | 2008        | DHS         | X                    | X        | X      | X       | X    | X   | X     | 2014                 | MICS        |                  |          | X      | X       | X    |     |       |   |
|                            | Senegal             | 2010        | DHS         | X                    | X        | X      | X       | X    | X   | X     | 2014                 | DHS         | X                | X        | X      | X       | X    | X   | X     |   |
|                            |                     | 2012        | DHS         | X                    | X        | X      | X       | X    | X   | X     |                      |             |                  |          |        |         |      |     |       |   |
|                            | State of Palestine  | 2010        | MICS        |                      |          | X      | X       | X    |     |       | 2014                 | MICS        |                  |          | X      | X       |      |     |       |   |
|                            | Sudan               | 2010        | MICS        |                      |          | X      | X       |      | X   | X     | 2014                 | MICS        |                  |          | X      | X       | X    | X   | X     |   |
| Upper-middle income (UMIC) | Albania             | 2008        | DHS         | X                    | X        | X      | X       |      | X   | X     | 2017                 | DHS         | X                | X        | X      | X       |      | X   | X     |   |
|                            | Belize              | 2011        | MICS        |                      |          | X      | X       | X    |     |       | 2015                 | MICS        |                  |          | X      | X       |      | X   | X     |   |
|                            | Cuba                | 2010        | MICS        |                      |          |        |         |      | X   | X     | 2014                 | MICS        |                  |          |        |         |      | X   | X     |   |
|                            | Iraq                | 2011        | MICS        |                      |          | X      | X       | X    | X   | X     | 2018                 | MICS        |                  |          | X      | X       |      | X   | X     |   |
|                            | Jordan              | 2012        | DHS         | X                    | X        | X      | X       | X    |     |       | 2017                 | DHS         | X                | X        | X      | X       | X    | X   | X     |   |
|                            | Kazakhstan          | 2010        | MICS        |                      |          | X      | X       |      |     |       | 2015                 | MICS        |                  |          | X      | X       |      |     |       |   |
|                            | Peru                |             | 2008        | DHS                  | X        | X      | X       | X    | X   |       |                      | 2014        | DHS              | X        | X      | X       | X    | X   | X     | X |
|                            |                     |             | 2009        | DHS                  | X        | X      | X       | X    | X   | X     | X                    | 2015        | DHS <sup>1</sup> | X        | X      | X       | X    | X   | X     | X |
|                            |                     |             | 2010        | DHS                  | X        | X      | X       | X    | X   | X     | X                    |             |                  |          |        |         |      |     |       |   |
|                            |                     |             | 2012        | DHS                  | X        | X      | X       | X    | X   | X     | X                    |             |                  |          |        |         |      |     |       |   |
|                            | Serbia              | 2010        | MICS        |                      |          | X      | X       |      |     |       | 2014                 | MICS        |                  |          | X      | X       |      |     |       |   |
|                            | Thailand            | 2012        | MICS        |                      |          | X      | X       |      | X   | X     | 2015                 | MICS        |                  |          | X      | X       |      |     |       |   |

<sup>1</sup> 2015 Peru DHS was a non standard survey
